# Supplementary material for: Herpes simplex encephalitis due to a mutation in an E3 ubiquitin ligase
Source: PubMed Central journal article supplement (PMC11087577; doi:10.1038/s41467-024-48287-0), 2024-05-10
Supplement: 41467_2024_48287_MOESM1_ESM.pdf [file 41467_2024_48287_MOESM1_ESM.pdf]

# Inventory of supplementary information

## Supplementary Tables

Supplementary Table 1. Identification of a heterozygous *WWP2* missense mutation

Supplementary Table 2. Experimental structures fetched and used for the  $\Delta\Delta G$  calculations.

Supplementary Table 3. Alignment metrics

Supplementary Table 4. AP-1 and NF- $\kappa$ B downstream enrichment for the difference in Poly(I:C) stimulation between *WWP2* p.R841H and *WWP2* p.R841.

Supplementary Table 5. Primers.

## Supplementary Figures

Supplementary Figure 1. Conservation of the Arginine 841 in vertebrate *WWP2* orthologues

Supplementary Figure 2. Conservation of the Arginine 841 in 38 *WWP2* paralogues

Supplementary Figure 3. Maximal and Minimal Energetic impact observed by the introduction of a R814H mutation in the HECT domain of *WWP2*.

Supplementary Figure 4. *WWP2*-dependent IFN responses in PBMCs.

Supplementary Figure 5 Significant downregulation of NF $\kappa$ B pathway downstream target genes in *WWP2* p.R841H compared to *WWP2* p.R841.

Supplementary Figure 6. Significant downregulation of AP-1 downstream target genes in *WWP2* p.R841H compared to *WWP2* p.R841.

Supplementary Table 1. Identification of a heterozygous WWP2 missense mutation

| Inheritance | Zygoty                | Gene and attributes |                                        |                             |                                                                           |                | Variants and attributes |                    |         |           |               |          |      | Remarks                                                                                                                                                            |
|-------------|-----------------------|---------------------|----------------------------------------|-----------------------------|---------------------------------------------------------------------------|----------------|-------------------------|--------------------|---------|-----------|---------------|----------|------|--------------------------------------------------------------------------------------------------------------------------------------------------------------------|
|             |                       | Gene                | DOMINO                                 | KO mice (MGI)               | Disease associated (OMIM)                                                 | Link with TLR3 | Change                  | Frequency (gnomAD) | Origin  | ClinVar   | Amino-acid    | MutScore | CADD |                                                                                                                                                                    |
| Recessive   | Homozygous            | None                |                                        |                             |                                                                           |                |                         |                    |         |           |               |          |      |                                                                                                                                                                    |
|             | Compound heterozygous | ZFYVE26             | Not relevant for recessive inheritance | No immunological phenotypes | Spastic paraplegia autosomal recessive                                    | No             | c.3881A>G               | NA                 | Mother  | No        | Not conserved | 0.053    | 15.9 | Not retained: mother variant with low deleteriousness prediction scores; association with an another disease and no link with immunological phenotype or function. |
|             |                       |                     |                                        |                             |                                                                           |                | c.961A>C                | 0.0134%            | Father  | Yes (VUS) | Conserved     | 0.383    | 27.7 |                                                                                                                                                                    |
|             |                       | FLNB                | Not relevant for recessive inheritance | Immune phenotype            | Larsen syndrome, autosomal dominant; Atelosteogenesis, autosomal dominant | No             | c.2237A>C               | 0.0012%            | Mother  | No        | Conserved     | 0.800    | 26.5 | Not retained: association with other unrelated diseases                                                                                                            |
|             |                       |                     |                                        |                             |                                                                           |                | c.4186G>A               | 0.0028%            | Father  | No        | Conserved     | 0.260    | 23.0 |                                                                                                                                                                    |
| c.5327T>C   | 0.0028%               | Father              | Yes (VUS)                              | Conserved                   | 0.864                                                                     | 28.4           |                         |                    |         |           |               |          |      |                                                                                                                                                                    |
| Dominant    | De novo               | RAB13               | <0.9                                   | No immunological phenotypes | NA                                                                        | No             | c.429T>G                | 0.0004%            | De novo | No        | Conserved     | 0.342    | 3.6  | Not retained: DOMINO score lower than 0.9 suggesting the absence of an association with a dominant phenotype and no link with immunological phenotypes             |
|             |                       | CNTNAP2             | <0.9                                   | No immunological phenotypes | NA                                                                        | No             | c.3427G>C               | 0.0032%            | De novo | No        | Conserved     | NA       | 22.9 | Not retained: DOMINO score lower than 0.9 suggesting the absence of an association with a dominant phenotype and no link with immunological phenotypes             |
|             | Heterozygous          | VANGL2              | 0.994                                  | No immunological phenotypes | Neural tube defects, autosomal dominant                                   | No             | c.931G>A                | 0.0018%            | Mother  | No        | Conserved     | 0.609    | 31.0 | Not retained: association with an another disease and no link with immunological phenotype or function.                                                            |
|             |                       | WWP2                | 0.987                                  | Immune phenotype            | NA                                                                        | Yes            | c.2522G>A               | 0.0012%            | Mother  | No        | Conserved     | 0.933    | 30.0 | Retained variant                                                                                                                                                   |

VUS: variant of uncertain significance; red means attribute pointing towards benign; green means attribute pointing towards pathogenic.

Supplementary Table 2. Experimental structures fetched and used for the  $\Delta\Delta G$  calculations.

| <b>Protein</b> | <b>PDB ID</b> | <b>Position of the Arg</b> |
|----------------|---------------|----------------------------|
| ITCH           | 5c7m[11]      | 874                        |
| ITCH           | 4be8[12]      | 874                        |
| NEDD4          | 2xbb[13]      | 870                        |
| NEDD4          | 5c7j[11]      | 870                        |
| NEDD4          | 2xbf[13]      | 870                        |
| NEDD4          | 4bbn[12]      | 870                        |
| NEDD4          | 5c7j[11]      | 870                        |
| NEDD4          | 5c91[14]      | 870                        |
| NEDD4L         | 3jw0[15]      | 925                        |
| NEDD4L         | 3jvz[15]      | 925                        |
| NEDD4L         | 2oni          | 925                        |
| NEDD4L         | 5hpk[11]      | 925                        |
| NEDD4L         | 3tug          | 925                        |
| SMURF2         | 1zvd[16]      | 719                        |
| WWP1           | 5hpt[11]      | 893                        |
| WWP1           | 1nd7[17]      | 893                        |
| WWP1           | 5hps[11]      | 893                        |
| WWP1           | 6j1y[10]      | 893                        |
| WWP2           | 4y07[7]       | 841                        |
| WWP2           | 5tj7[9]       | 841                        |
| WWP2           | 5tj8[9]       | 841                        |
| WWP2           | 5tjq[9]       | 841                        |
| WWP2           | 6j1z[10]      | 841                        |

Supplementary Table 3. Alignment metrics

| METRIC                                   | Medium       |            |            |             |            |            |
|------------------------------------------|--------------|------------|------------|-------------|------------|------------|
|                                          | M1           | M2         | M3         | M4          | M5         | M6         |
|                                          | WWP2 p.R841H |            |            | WWP2 p.R841 |            |            |
| TOTAL_READS                              | 61404314     | 56700356   | 49370062   | 45803731    | 39504625   | 51486150   |
| QUALITY_TRIMMED_BASES_CUTADAPT           | 3108195      | 2832236    | 2412693    | 2208621     | 1954858    | 2585471    |
| DISCARDED_RRNA                           | 1324677      | 1242723    | 1118972    | 874830      | 796844     | 961455     |
| DISCARDED_LOW_COMPLEXITY                 | 2015832      | 1904131    | 1562551    | 1420469     | 1182211    | 1519207    |
| CLEAN_READS                              | 58063805     | 53553502   | 46688539   | 43508432    | 37525570   | 49005488   |
| CLEAN_READS_ALIGNED                      | 57630213     | 53156202   | 46298847   | 43174694    | 37224466   | 48525756   |
| PCT_CLEAN_READS_ALIGNED                  | 99.25        | 99.26      | 99.17      | 99.23       | 99.20      | 99.02      |
| CLEAN_ALIGNED_BASES                      | 5714999190   | 5271242811 | 4584518715 | 4280282645  | 3684401479 | 4798146339 |
| MEAN_READ_LENGTH                         | 100.63       | 100.63     | 100.63     | 100.63      | 100.63     | 100.63     |
| READS_ALIGNED_IN_PAIRS                   | 0            | 0          | 0          | 0           | 0          | 0          |
| PCT_READS_ALIGNED_IN_PAIRS               | 0            | 0          | 0          | 0           | 0          | 0          |
| STRAND_BALANCE                           | 0.49         | 0.49       | 0.49       | 0.49        | 0.49       | 0.49       |
| UNMAPPED_READS                           | 433592       | 397300     | 389692     | 333738      | 301104     | 479732     |
| UNPAIRED_READ_DUPLICATES                 | 45560639     | 41166756   | 36076528   | 33046874    | 28560896   | 37173925   |
| READ_PAIR_OPTICAL_DUPLICATES             | 0            | 0          | 0          | 0           | 0          | 0          |
| UNIQUELY_ALIGNED                         | 53510871     | 49385004   | 42771873   | 39910933    | 34156643   | 45031471   |
| MULTIPLE_ALIGNMENT                       | 4119342      | 3771198    | 3526974    | 3263761     | 3067823    | 3494285    |
| READ_ALIGNED_TO_REF_EXONS                | 49788822     | 45731048   | 39749318   | 37099139    | 31733428   | 41742606   |
| NO_FEATURE                               | 1720314      | 1824510    | 1347082    | 1239129     | 999908     | 1564898    |
| AMBIGUOUS                                | 2001735      | 1829446    | 1675473    | 1572665     | 1423307    | 1723967    |
| TOO_LOW_AQUAL                            | 0            | 0          | 0          | 0           | 0          | 0          |
| NOT_ALIGNED                              | 433592       | 397300     | 389692     | 333738      | 301104     | 479732     |
| ALIGNMENT_NOT_UNIQUE                     | 10518228     | 9685821    | 9010348    | 8362435     | 7952180    | 8953669    |
| BIAS_INDEX_50                            | 54.11        | 54.01      | 56.14      | 55.30       | 57.89      | 54.46      |
| SOVER3_COV_RATIO                         | 0.72         | 0.73       | 0.62       | 0.66        | 0.55       | 0.71       |
| UNMAPPED_READS_ALIGNED_TO_MITOCHONDRIA   | 3659         | 3042       | 3911       | 3564        | 3849       | 3838       |
| UNMAPPED_READS_ALIGNED_TO_MITOCHONDRIA_% | 0.84         | 0.77       | 1.00       | 1.07        | 1.28       | 0.80       |
| MAPPED_READS_ALIGNED_TO_MITOCHONDRIA     | 851676       | 732384     | 813191     | 819909      | 728887     | 631739     |
| MAPPED_READS_ALIGNED_TO_MITOCHONDRIA_%   | 1.48         | 1.38       | 1.76       | 1.90        | 1.96       | 1.30       |

Supplementary Table 3 continued.

| METRIC                                   | 3h Poly(I:C) stimulation |            |            |             |            |            |
|------------------------------------------|--------------------------|------------|------------|-------------|------------|------------|
|                                          | P1                       | P2         | P3         | P4          | P5         | P6         |
|                                          | WWP2 p.R841H             |            |            | WWP2 p.R841 |            |            |
| TOTAL_READS                              | 48728829                 | 47270714   | 43680905   | 52993268    | 39831724   | 41632801   |
| QUALITY_TRIMMED_BASES_CUTADAPT           | 2428027                  | 2501289    | 2373526    | 2667698     | 2128498    | 2081268    |
| DISCARDED_RRNA                           | 1060753                  | 1072967    | 1240241    | 1247690     | 885686     | 879336     |
| DISCARDED_LOW_COMPLEXITY                 | 1436123                  | 1517397    | 1447652    | 1751882     | 1291267    | 1325801    |
| CLEAN_READS                              | 46231953                 | 44680350   | 40993012   | 49993696    | 37654771   | 39427664   |
| CLEAN_READS_ALIGNED                      | 45783710                 | 44182694   | 40427824   | 49563315    | 37319708   | 39121426   |
| PCT_CLEAN_READS_ALIGNED                  | 99.03                    | 98.89      | 98.62      | 99.14       | 99.11      | 99.22      |
| CLEAN_ALIGNED_BASES                      | 4529804390               | 4375223110 | 4003958595 | 4909172403  | 3698618521 | 3880188262 |
| MEAN_READ_LENGTH                         | 100.62                   | 100.59     | 100.62     | 100.63      | 100.62     | 100.63     |
| READS_ALIGNED_IN_PAIRS                   | 0                        | 0          | 0          | 0           | 0          | 0          |
| PCT_READS_ALIGNED_IN_PAIRS               | 0                        | 0          | 0          | 0           | 0          | 0          |
| STRAND_BALANCE                           | 0.48                     | 0.48       | 0.48       | 0.48        | 0.48       | 0.48       |
| UNMAPPED_READS                           | 448243                   | 497656     | 565188     | 430381      | 335063     | 306238     |
| UNPAIRED_READ_DUPLICATES                 | 34448409                 | 33172503   | 29731483   | 37897026    | 27149076   | 28731985   |
| READ_PAIR_OPTICAL_DUPLICATES             | 0                        | 0          | 0          | 0           | 0          | 0          |
| UNIQUELY_ALIGNED                         | 42499812                 | 40931521   | 37526946   | 45977698    | 34615723   | 36306352   |
| MULTIPLE_ALIGNMENT                       | 3283898                  | 3251173    | 2900878    | 3585617     | 2703985    | 2815074    |
| READ_ALIGNED_TO_REF_EXONS                | 39041026                 | 37738884   | 34506696   | 42144811    | 31806447   | 33421944   |
| NO_FEATURE                               | 1892503                  | 1665129    | 1631048    | 2109850     | 1511784    | 1528196    |
| AMBIGUOUS                                | 1566283                  | 1527508    | 1389202    | 1723037     | 1297492    | 1356212    |
| TOO_LOW_AQUAL                            | 0                        | 0          | 0          | 0           | 0          | 0          |
| NOT_ALIGNED                              | 448243                   | 497656     | 565188     | 430381      | 335063     | 306238     |
| ALIGNMENT_NOT_UNIQUE                     | 8358927                  | 8273480    | 7343938    | 9114837     | 6871505    | 7136669    |
| BIAS_INDEX_50                            | 53.24                    | 53.25      | 53.13      | 52.96       | 53.09      | 53.24      |
| SOVER3_COV_RATIO                         | 0.78                     | 0.77       | 0.78       | 0.79        | 0.78       | 0.77       |
| UNMAPPED_READS_ALIGNED_TO_MITOCHONDRIA   | 8744                     | 8650       | 11398      | 7827        | 6745       | 4984       |
| UNMAPPED_READS_ALIGNED_TO_MITOCHONDRIA_% | 1.95                     | 1.74       | 2.02       | 1.82        | 2.01       | 1.63       |
| MAPPED_READS_ALIGNED_TO_MITOCHONDRIA     | 1631704                  | 1616308    | 1507569    | 1776657     | 1474545    | 1319356    |
| MAPPED_READS_ALIGNED_TO_MITOCHONDRIA_%   | 3.56                     | 3.66       | 3.73       | 3.58        | 3.95       | 3.37       |

Supplementary Table 4. AP-1 and NF-kB downstream enrichment for the difference in Poly(I:C) stimulation between WWP2 p.R841H and WWP2 p.R841.

| Pathway              | FDR adjusted-p value | Normalized Enrichment Score |
|----------------------|----------------------|-----------------------------|
| NF-kB atypical       | 4.02e-01             | 1.09                        |
| NF-kB non-canonical  | 4.02e-01             | -1.10                       |
| NF-kB canonical      | 3.02e-02             | -1.65                       |
| TNF: AP-1 Downstream | 3.55e-05             | -2.07                       |

| Complete pathways | FDR adjusted-p value | Normalized Enrichment Score |
|-------------------|----------------------|-----------------------------|
| hsa:04064         | 7.32e-02             | -1.37                       |
| hsa:04668         | 7.89e-05             | -1.90                       |

P-values were computed using the adaptive multi-level split Monte-Carlo approach of R package fgsea. Positive and negative enrichment are considered (two-sided). P-values were corrected for multiple testing using False Discovery Rate. FDR stands for False Discovery Rate.

Supplementary Table 5. Primers.

|       | Forward                      | Reverse                      |
|-------|------------------------------|------------------------------|
| TLR3  | 5'-GTGCCAGAACTTCCCATGT-3'    | 5'-TCCAGCTGAACCTGAGTTCC-3'   |
| WWP2  | 5'-CTTGTCGTGTCGTTCCGCTT-3'   | 5'-ACCATTGCTTCACACTTGACTT-3' |
| TRIF  | 5'-GCCAGCAACTTGGAAATCAGC-3'  | 5'-GGGGTCGTCACAGAGCTTG-3'    |
| IFNB  | 5'-CATTACCTGAAGGCCAAGGA-3'   | 5'-CAGCATCTGCTGGTTGAAGA-3'   |
| ISG56 | 5'-CCTCCTTGGGTTCTGTCTACA-3'  | 5'-GGCTGATATCTGGGTGCCTA-3'   |
| MX1   | 5'-ACCTACAGCTGGCTCCTGAA-3'   | 5'-CGGCTAACGGATAAGCAGAG-3'   |
| IFIT2 | 5'-ACAAGGCCATCCACCACTTTAT-3' | 5'-CCCAGCAATTCAGGTGTTAACA-3' |
| TNF   | 5'-CAGAGGGCCTGTACCTCATC-3'   | 5'-GGAAGACCCCTCCAGATAG-3'    |
| HPRT  | 5'-GAACGTCTTGCTCGAGATGTG-3'  | 5'-CCAGCAGGTCAGCAAAGAATT-3'  |

Supplementary Figure 1. Conservation of the Arginine 841 in vertebrate WWP2 orthologues

| Organism     | Begin | Amino acids (green = different from human) |   |   |   |   |   |   |   |   |   |   |   |   |   |   |   |   |   |   |   |   |   |   |   |   |   |   |   | End |   |   |   |   |   |   |   |   |   |   |   |   |   |   |   |   |     |     |
|--------------|-------|--------------------------------------------|---|---|---|---|---|---|---|---|---|---|---|---|---|---|---|---|---|---|---|---|---|---|---|---|---|---|---|-----|---|---|---|---|---|---|---|---|---|---|---|---|---|---|---|---|-----|-----|
| H.sapiens    | 779   | F                                          | W | Q | V | V | K | E | M | D | N | E | K | R | I | R | L | L | Q | F | V | T | G | T | C | R | L | P | V | G   | G | F | A | E | L | I | G | S | N | G | P | Q | K | F | C | I | D   | 824 |
| M.mulatta    | 779   | F                                          | W | Q | V | V | K | E | M | D | N | E | K | R | I | R | L | L | Q | F | V | T | G | T | C | R | L | P | V | G   | G | F | A | E | L | I | G | S | N | G | P | Q | K | F | C | I | D   | 824 |
| C.lupus      | 791   | F                                          | W | Q | V | V | K | E | M | D | N | E | K | R | I | R | L | L | Q | F | V | T | G | T | C | R | L | P | V | G   | G | F | A | E | L | I | G | S | N | G | P | Q | K | F | C | I | D   | 836 |
| B.taurus     | 779   | F                                          | W | Q | V | V | K | E | M | D | N | E | K | R | I | R | L | L | Q | F | V | T | G | T | C | R | L | P | V | G   | G | F | T | E | L | I | G | S | N | G | P | Q | K | F | C | I | D   | 824 |
| M.musculus   | 779   | F                                          | W | Q | V | V | K | E | M | D | N | E | K | R | I | R | L | L | Q | F | V | T | G | T | C | R | L | P | V | G   | G | F | A | E | L | I | G | S | N | G | P | Q | K | F | C | I | D   | 824 |
| R.norvegicus | 779   | F                                          | W | Q | V | V | K | E | M | D | N | E | K | R | I | R | L | L | Q | F | V | T | G | T | C | R | L | P | V | G   | G | F | A | E | L | I | G | S | N | G | P | Q | K | F | C | I | D   | 824 |
| G.gallus     | 833   | F                                          | W | Q | V | V | K | E | M | D | N | E | K | R | I | R | L | L | Q | F | V | T | G | T | C | R | L | P | V | G   | G | F | A | E | L | I | G | S | N | G | P | Q | K | F | C | I | D   | 878 |
| D.rerio      | 775   | F                                          | W | Q | V | V | K | E | M | D | N | E | K | R | I | R | L | L | Q | F | V | T | G | T | C | R | L | P | V | G   | G | F | A | E | L | I | G | S | N | G | P | Q | K | F | C | I | D   | 820 |
| X.tropicalis | 638   | F                                          | W | Q | V | V | K | E | M | D | N | E | K | R | I | R | L | L | Q | F | V | T | G | T | C | R | L | P | V | G   | G | V | E | L | I | G | S | N | G | P | Q | K | F | C | I | D | 683 |     |

| Organism     | Begin | Amino acids (green = different from human, red = R841 in human) |   |   |   |   |   |   |   |   |   |   |   |   |   |   |   |   |   |   |   |   |   |   |   |   |   |   |   | End |   |   |   |   |   |   |   |   |   |   |   |   |   |   |   |   |   |     |
|--------------|-------|-----------------------------------------------------------------|---|---|---|---|---|---|---|---|---|---|---|---|---|---|---|---|---|---|---|---|---|---|---|---|---|---|---|-----|---|---|---|---|---|---|---|---|---|---|---|---|---|---|---|---|---|-----|
| H.sapiens    | 825   | K                                                               | V | G | K | E | T | W | L | P | R | S | H | T | C | F | N | R | L | D | L | P | P | Y | K | S | Y | E | Q | L   | R | E | K | L | L | Y | A | I | E | E | T | E | G | F | G | Q | E | 870 |
| M.mulatta    | 825   | K                                                               | V | G | K | E | T | W | L | P | R | S | H | T | C | F | N | R | L | D | L | P | P | Y | K | S | Y | E | Q | L   | R | E | K | L | L | Y | A | I | E | E | T | E | G | F | G | Q | E | 870 |
| C.lupus      | 837   | K                                                               | V | G | K | E | T | W | L | P | R | S | H | T | C | F | N | R | L | D | L | P | P | Y | K | S | Y | E | Q | L   | R | E | K | L | L | Y | A | I | E | E | T | E | G | F | G | Q | E | 882 |
| B.taurus     | 825   | K                                                               | V | G | K | E | T | W | L | P | R | S | H | T | C | F | N | R | L | D | L | P | P | Y | K | S | Y | E | Q | L   | K | E | K | L | L | Y | A | V | E | E | T | E | G | F | G | Q | E | 870 |
| M.musculus   | 825   | R                                                               | V | G | K | E | T | W | L | P | R | S | H | T | C | F | N | R | L | D | L | P | P | Y | K | S | Y | E | Q | L   | K | E | K | L | L | Y | A | I | E | E | T | E | G | F | G | Q | E | 870 |
| R.norvegicus | 825   | R                                                               | V | G | K | E | T | W | L | P | R | S | H | T | C | F | N | R | L | D | L | P | P | Y | K | S | Y | E | Q | L   | K | E | K | L | L | Y | A | I | E | E | T | E | G | F | G | Q | E | 870 |
| G.gallus     | 879   | K                                                               | V | G | K | E | T | W | L | P | R | S | H | T | C | F | N | R | L | D | L | P | P | Y | K | S | Y | E | Q | L   | K | E | K | L | L | Y | A | I | E | E | T | E | G | F | G | Q | E | 924 |
| D.rerio      | 821   | K                                                               | V | G | K | E | T | W | L | P | R | S | H | T | C | F | N | R | L | D | L | P | P | Y | K | N | L | E | Q | L   | R | E | K | L | L | F | A | I | E | E | T | E | G | F | G | Q | E | 866 |
| X.tropicalis | 684   | R                                                               | V | G | K | D | T | W | L | P | R | S | H | T | C | F | N | R | L | D | L | P | P | Y | K | S | Y | E | Q | L   | K | E | K | L | L | F | A | I | E | E | T | E | G | F | G | Q | E | 729 |

| Organism   | Protein Accession              | Organism     | Protein Accession              |
|------------|--------------------------------|--------------|--------------------------------|
| H.sapiens  | <a href="#">NP_001257383.1</a> | R.norvegicus | <a href="#">NP_001099654.1</a> |
| M.mulatta  | <a href="#">XP_001101869.1</a> | G.gallus     | <a href="#">NP_001034349.1</a> |
| C.lupus    | <a href="#">XP_851140.3</a>    | D.rerio      | <a href="#">NP_001092918.1</a> |
| B.taurus   | <a href="#">NP_001076883.1</a> | X.tropicalis | <a href="#">NP_001090841.1</a> |
| M.musculus | <a href="#">NP_080106.1</a>    |              |                                |





Supplementary Figure 3. Maximal and Minimal Energetic impact observed by the introduction of a R814H mutation in the HECT domain of WWP2.

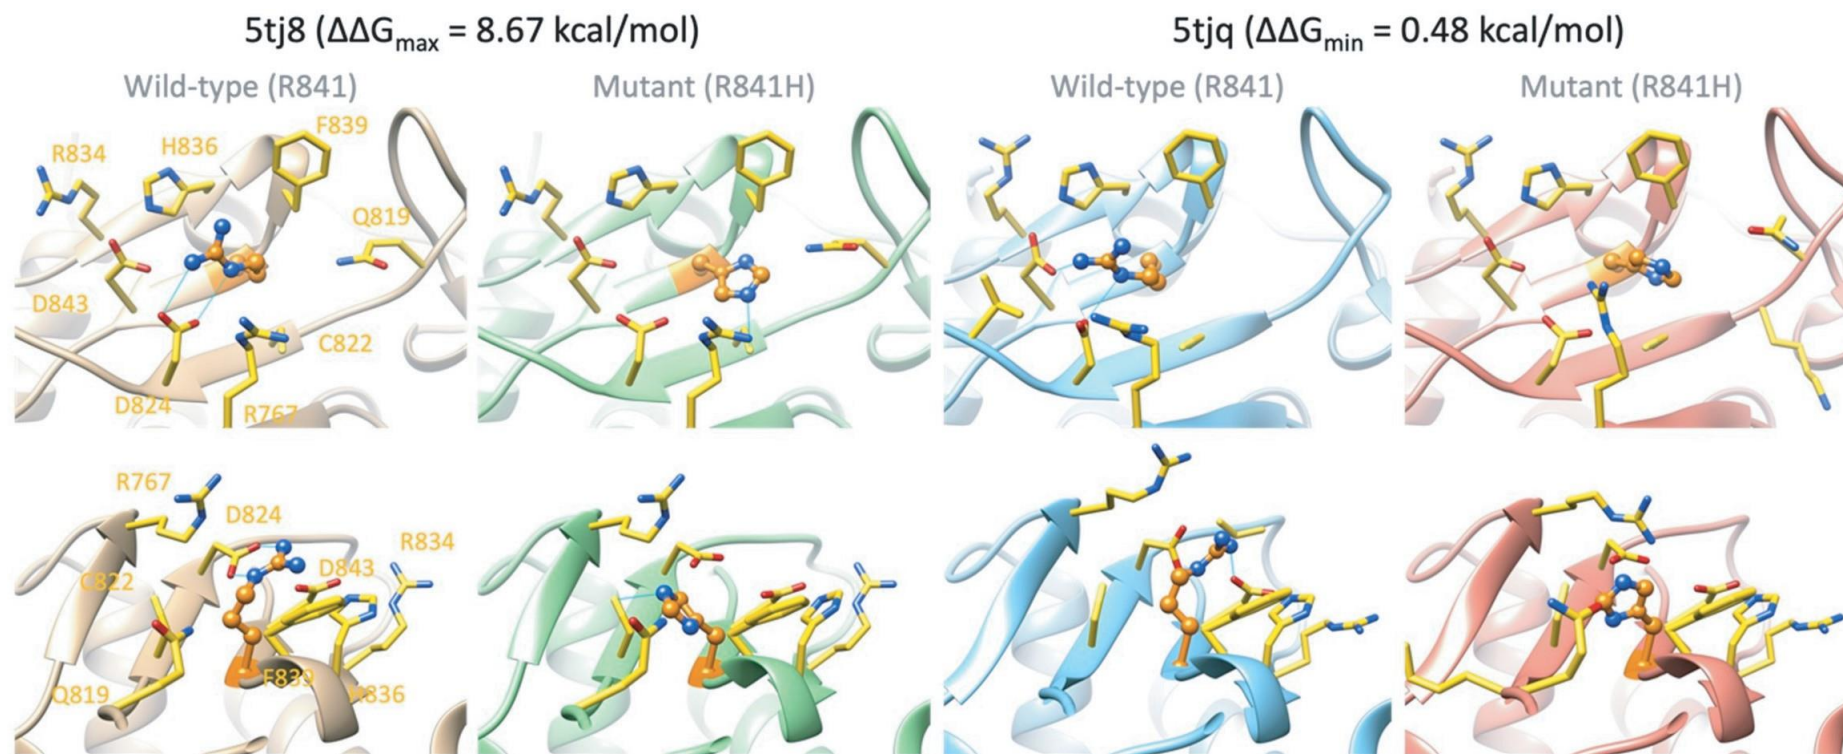

Supplementary Figure 4. WWP2-dependent IFN responses in PBMCs.

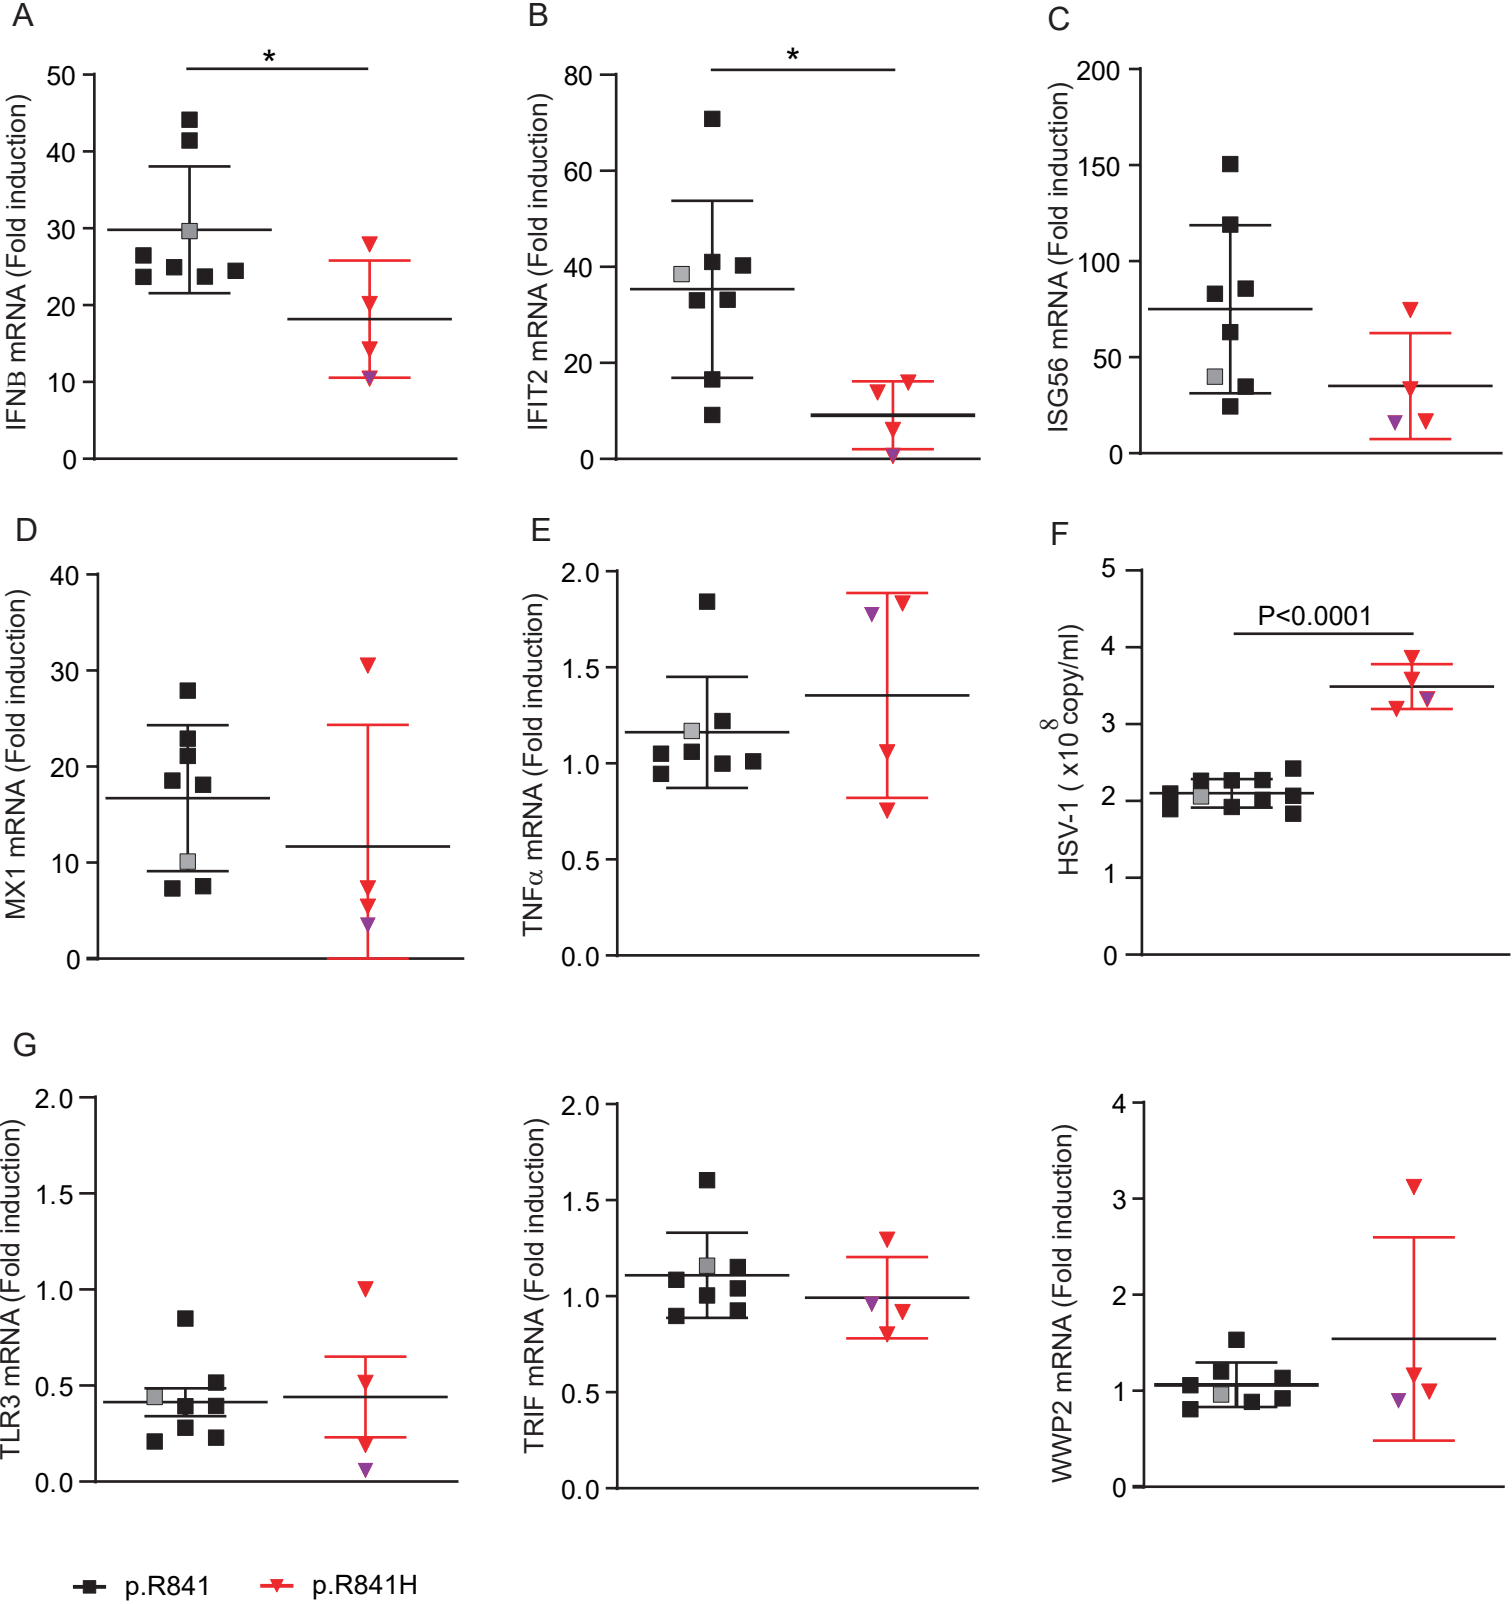

Expression of IFN $\beta$  (A), IFIT2 (B), ISG56 (C), MX1 (D), TNF $\alpha$  (E) as well as TLR3, TRIF, WWP2 (G) mRNA and quantification of the number of viral genome (F) in PBMCs from individuals carrying p.R841 WWP2 (black, N=8-11) or from individuals carrying p.R841H WWP2 (red, N=4) stimulated with Poly(I:C). Results represent the mean  $\pm$  standard error of 1 representative experiment among 4. Statistical analyses were performed using an unpaired two-tailed Student t-test. The purple triangle and the grey square correspond to patient with HSE and to patient's father respectively. \* indicates P=0.0405(A) and P=0.02 (B).

Supplementary Figure 5 Significant downregulation of NFKB pathway downstream target genes in WWP2 p.R841H compared to WWP2 p.R841.

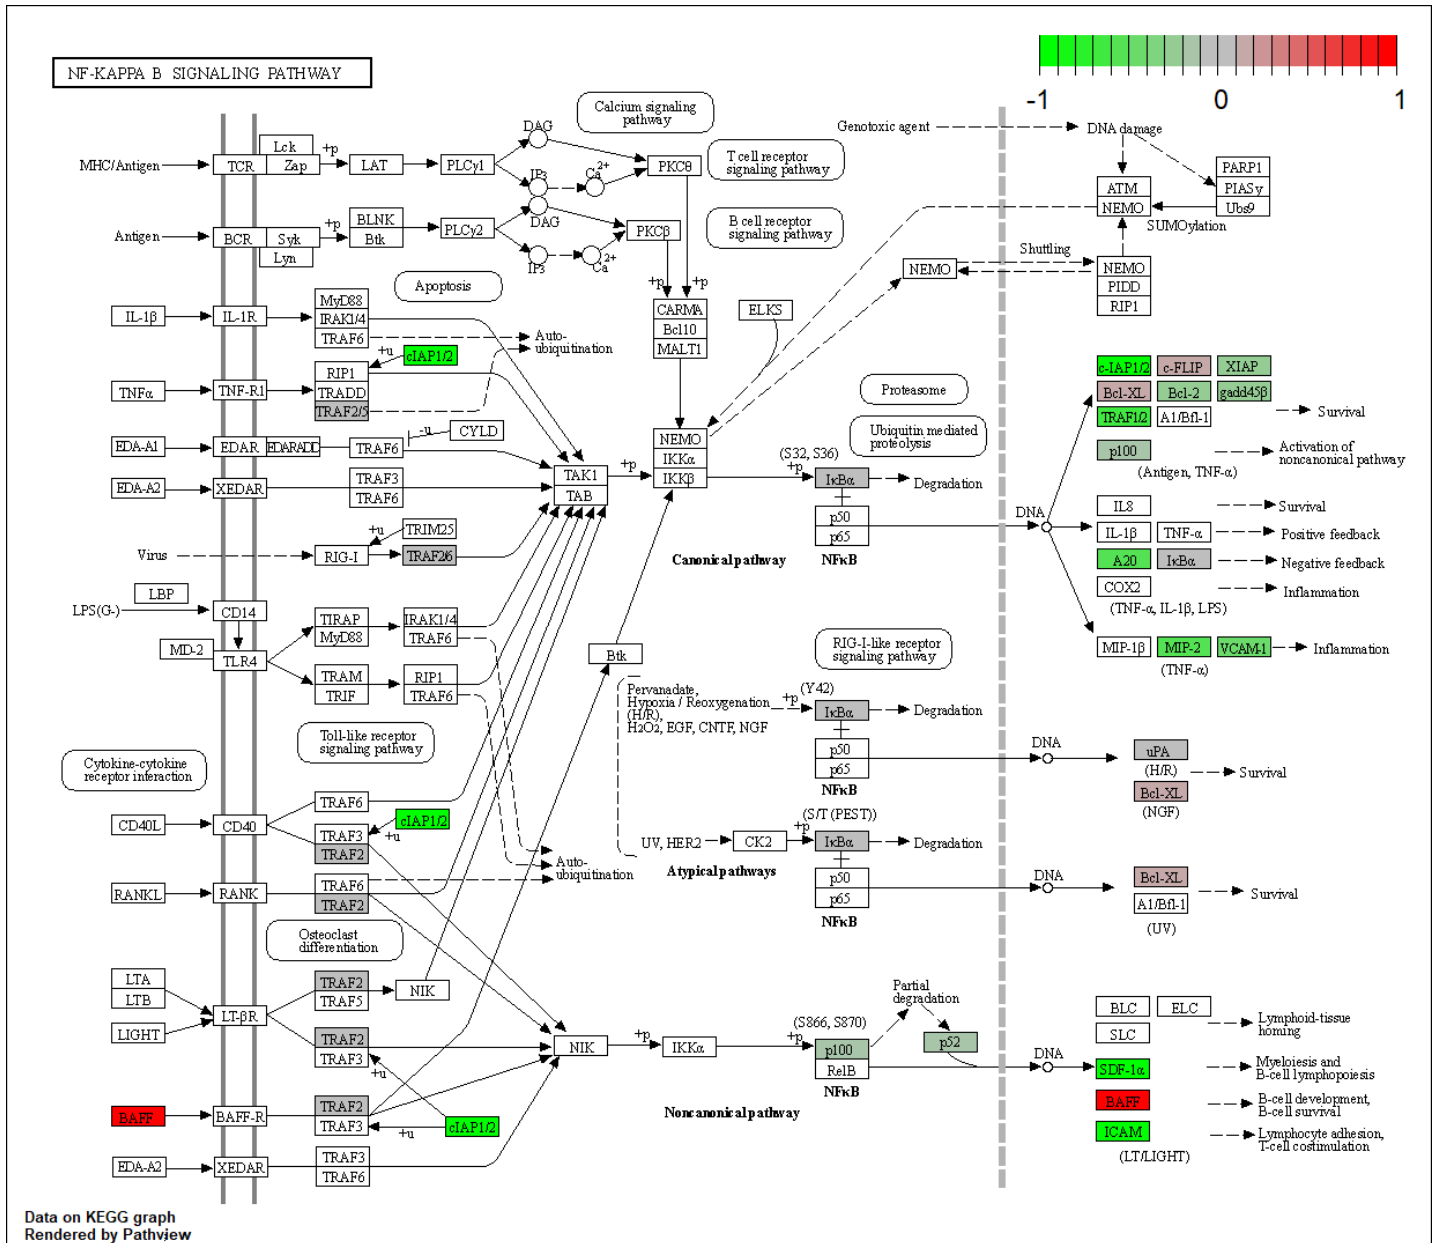

Supplementary Figure 6. Significant downregulation of AP-1 downstream target genes in WWP2 p.R841H compared to WWP2 p.R841.

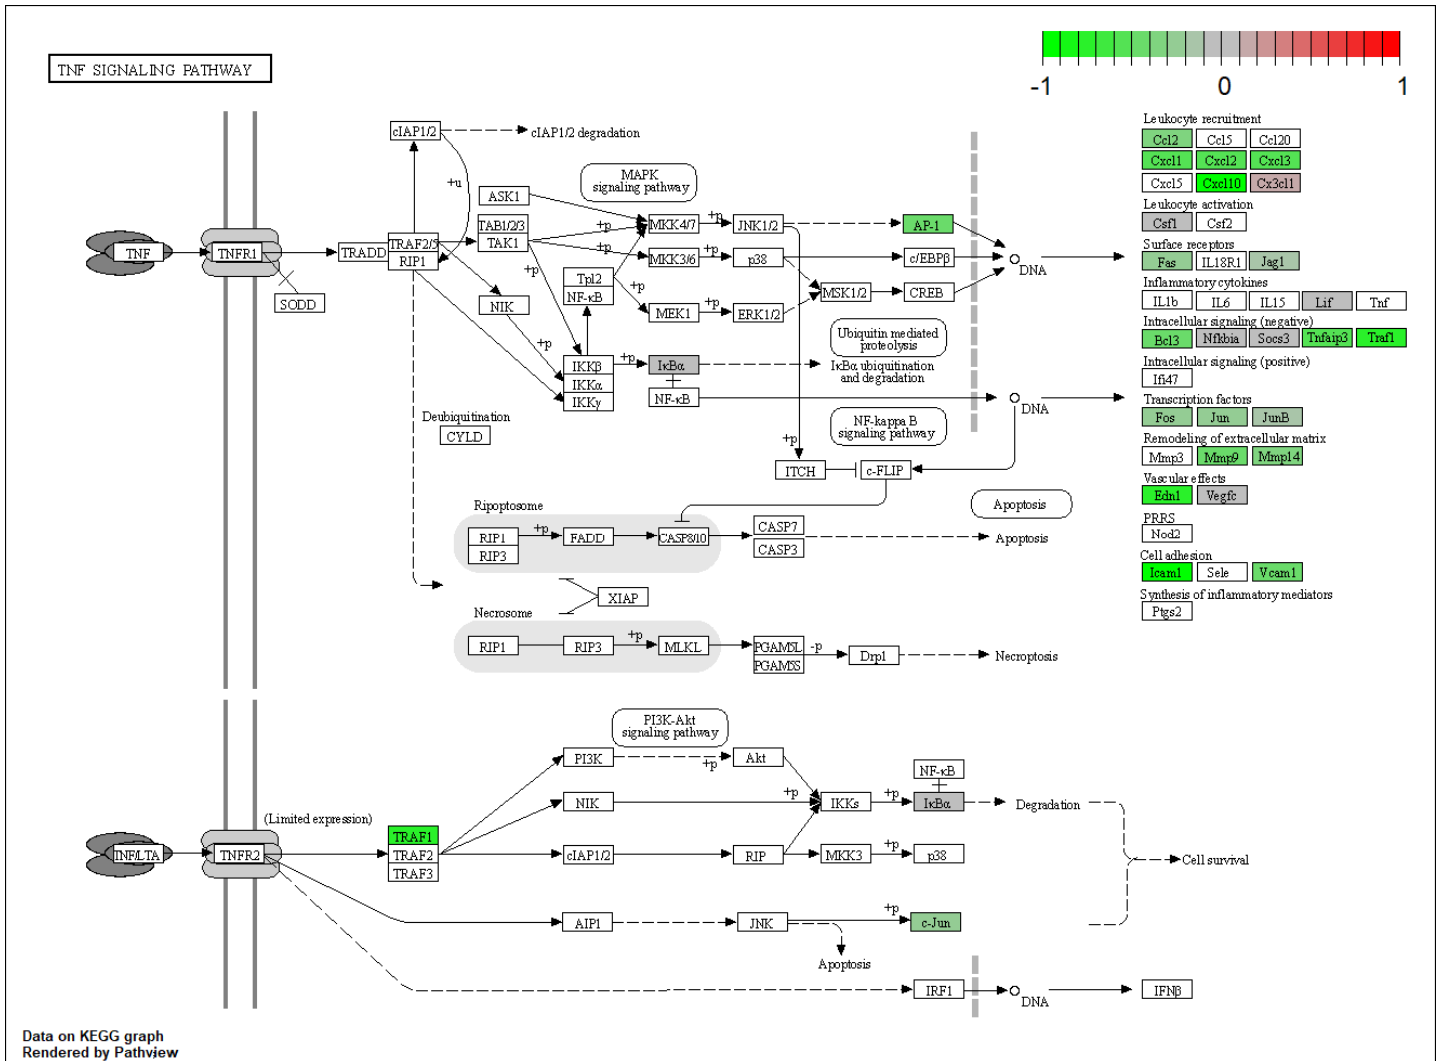

Data on KEGG graph  
Rendered by Pathview
